# Supplementary material
Source: MDPI journal article supplement (https://www.mdpi.com/2073-4441/10/10/1352)
Supplement: s1 [file s1]

# Human Health Impact of Cross-Connections in Non-potable Reuse Systems

Mary E. Schoen,<sup>a</sup> Michael A. Jahne,<sup>b</sup> and Jay Garland<sup>b</sup>

a. Soller Environmental, Inc., 3022 King St., Berkeley, CA 94703, USA;

mschoen@sollerenvironmental.com

b. U.S. Environmental Protection Agency, 26 W. Martin Luther King Drive, Cincinnati OH 45268,

USA; Jahne.Michael@epa.gov, Garland.jay@epa.gov

## Contents

|                                                                                                                                                                                                                                                                                                                                  |   |
|----------------------------------------------------------------------------------------------------------------------------------------------------------------------------------------------------------------------------------------------------------------------------------------------------------------------------------|---|
| Table S1. Simulated pathogen concentrations [ $\log_{10}$ per L] in greywater: percentiles of concentration <sup>a</sup> ...                                                                                                                                                                                                     | 4 |
| Table S2. Simulated pathogen concentrations [ $\log_{10}$ per L] in onsite wastewater: percentiles of concentration <sup>a</sup> .....                                                                                                                                                                                           | 4 |
| Figure S1. 95 <sup>th</sup> percentile event probability of infection for ingestion of potable water contaminated by domestic, non-potable reclaimed wastewater from residential collection of 40,000 people. ....                                                                                                               | 5 |
| Figure S2. 95 <sup>th</sup> percentile event probability of infection for ingestion of potable water contaminated by domestic, non-potable reclaimed wastewater from residential collection of 1,000 people. <sup>1</sup> .....                                                                                                  | 5 |
| Figure S3. 95 <sup>th</sup> percentile event probability of infection for ingestion of potable water contaminated by domestic, non-potable reclaimed wastewater from office collection of 4,500 people. ....                                                                                                                     | 6 |
| Figure S4. 95 <sup>th</sup> percentile event probability of infection for ingestion of potable water contaminated by domestic, non-potable reclaimed greywater from residential collection of 40,000 people. ....                                                                                                                | 6 |
| Figure S5. 95 <sup>th</sup> percentile event probability of infection for ingestion of potable water contaminated by domestic, non-potable reclaimed greywater from residential collection of 1,000 people. ....                                                                                                                 | 7 |
| Figure S6. 95 <sup>th</sup> percentile event probability of infection for ingestion of potable water contaminated by domestic, non-potable reclaimed greywater from office collection of 4,500 people. ....                                                                                                                      | 7 |
| Figure S7. Safe dilution factor of intrusion of non-potable reclaimed wastewater (generated by 40,000-person residential collection and treated for indoor reuse) to potable water supply that results in a 95 <sup>th</sup> percentile annual risk of infection from non-potable indoor reuse equivalent to $10^{-4}$ ppy. .... | 8 |
| Figure S8. Safe dilution factor of intrusion of non-potable reclaimed wastewater (generated by 1,000-person residential collection and treated for indoor reuse) to potable water supply that results in a 95 <sup>th</sup> percentile annual risk of infection from non-potable indoor reuse equivalent to $10^{-4}$ ppy. ....  | 8 |

|                                                                                                                                                                                                                                                                                                                             |    |
|-----------------------------------------------------------------------------------------------------------------------------------------------------------------------------------------------------------------------------------------------------------------------------------------------------------------------------|----|
| Figure S9. Safe dilution factor of intrusion of non-potable reclaimed wastewater (generated by 4,500-person office collection and treated for indoor reuse) to potable water supply that results in a 95 <sup>th</sup> percentile annual risk of infection from non-potable indoor reuse equivalent to $10^{-4}$ ppy.       | 9  |
| Figure S10. Safe dilution factor of intrusion of non-potable reclaimed greywater (generated by 40,000-person residential collection and treated for indoor reuse) to potable water supply that results in a 95 <sup>th</sup> percentile annual risk of infection from non-potable indoor reuse equivalent to $10^{-4}$ ppy. | 9  |
| Figure S11. Safe dilution factor of intrusion of non-potable reclaimed greywater (generated by 1,000-person residential collection and treated for indoor reuse) to potable water supply that results in a 95 <sup>th</sup> percentile annual risk of infection from non-potable indoor reuse equivalent to $10^{-4}$ ppy.  | 10 |
| Figure S12. Safe dilution factor of intrusion of non-potable reclaimed greywater (generated by 4,500-person office collection and treated for indoor reuse) to potable water supply that results in a 95 <sup>th</sup> percentile annual risk of infection from non-potable indoor reuse equivalent to $10^{-4}$ ppy.       | 10 |
| Figure S13. 95 <sup>th</sup> percentile event probability of infection for ingestion of domestic, non-potable reclaimed wastewater contaminated by domestic wastewater generated by a 40,000-person residential collection system.                                                                                          | 11 |
| Figure S14. 95 <sup>th</sup> percentile event probability of infection for ingestion of domestic, non-potable reclaimed wastewater contaminated by domestic wastewater generated by a 1,000-person residential collection system.                                                                                           | 11 |
| Figure S15. 95 <sup>th</sup> percentile event probability of infection for ingestion of domestic, non-potable reclaimed wastewater contaminated by domestic wastewater generated by a 4,500-person office collection system.                                                                                                | 12 |
| Figure S16. 95 <sup>th</sup> percentile event probability of infection for ingestion of domestic, non-potable reclaimed greywater contaminated by domestic greywater generated by a 40,000-person residential collection system.                                                                                            | 12 |
| Figure S17. 95 <sup>th</sup> percentile event probability of infection for ingestion of domestic, non-potable reclaimed greywater contaminated by domestic greywater generated by a 1,000-person residential collection system.                                                                                             | 13 |
| Figure S18. 95 <sup>th</sup> percentile event probability of infection for ingestion of domestic, non-potable reclaimed greywater contaminated by domestic greywater generated by a 4,500-person office collection system.                                                                                                  | 13 |
| Figure S19. Safe dilution factor of intrusion of residential wastewater (generated by 40,000-person collection) to non-potable reclaimed water supply that results in a 95 <sup>th</sup> percentile annual risk of infection from non-potable domestic, indoor reuse equivalent to the benchmark ( $10^{-4}$ ppy).          | 14 |
| Figure S20. Safe dilution factor of intrusion of residential wastewater (generated by 1,000-person collection) to non-potable reclaimed water supply that results in a 95 <sup>th</sup> percentile annual risk of infection from non-potable domestic, indoor reuse equivalent to the benchmark ( $10^{-4}$ ppy).           | 14 |
| Figure S21. Safe dilution factor of intrusion of office wastewater (generated by 4,500-person collection) to non-potable reclaimed water supply that results in a 95 <sup>th</sup> percentile annual risk of infection from non-potable domestic, indoor reuse equivalent to the benchmark ( $10^{-4}$ ppy).                | 15 |

|                                                                                                                                                                                                                                                                                                                            |    |
|----------------------------------------------------------------------------------------------------------------------------------------------------------------------------------------------------------------------------------------------------------------------------------------------------------------------------|----|
| Figure S22. Safe dilution factor of intrusion of residential greywater (generated by 40,000-person collection) to non-potable water supply that results in a 95 <sup>th</sup> percentile annual risk of infection from non-potable domestic, indoor reuse equivalent to the benchmark ( $10^{-4}$ ppy). <sup>2</sup> ..... | 15 |
| Figure S23. Safe dilution factor of intrusion of residential greywater (generated by 1,000-person collection) to non-potable water supply that results in a 95 <sup>th</sup> percentile annual risk of infection from non-potable domestic, indoor reuse equivalent to the benchmark ( $10^{-4}$ ppy). <sup>2</sup> .....  | 16 |
| Figure S24. Safe dilution factor of intrusion of residential greywater (generated by 4,500-person collection) to non-potable water supply that results in a 95 <sup>th</sup> percentile annual risk of infection from non-potable domestic, indoor reuse equivalent to the benchmark ( $10^{-4}$ ppy). <sup>2</sup> .....  | 16 |

**Table S1.** Simulated pathogen concentrations [ $\log_{10}$  per L] in greywater: percentiles of concentration<sup>a</sup>.

|                        | 40000-persons<br>Residential |     |     | 1000-persons<br>Residential |      |     | 4500-persons<br>Office |      |     |
|------------------------|------------------------------|-----|-----|-----------------------------|------|-----|------------------------|------|-----|
|                        | 5%                           | 50% | 95% | 5%                          | 50%  | 95% | 5%                     | 50%  | 95% |
| <i>Campylobacter</i>   | -0.3                         | 1.1 | 2.7 | -Inf                        | -Inf | 1.5 | -Inf                   | -1.2 | 1.5 |
| <i>Cryptosporidium</i> | -1.3                         | 0.3 | 1.9 | -Inf                        | -Inf | 0.7 | -Inf                   | -Inf | 0.7 |
| <i>Norovirus</i>       | 4.5                          | 5.1 | 6.0 | 0.9                         | 3.8  | 5.7 | 2.9                    | 3.8  | 4.7 |
| <i>Rotavirus</i>       | 2.4                          | 3.6 | 5.0 | -Inf                        | -Inf | 4.1 | -Inf                   | 1.5  | 3.9 |

a. -Inf indicates a concentration of 0 #/L.

**Table S2.** Simulated pathogen concentrations [ $\log_{10}$  per L] in onsite wastewater: percentiles of concentration<sup>a</sup>.

|                        | 40000-persons<br>Residential |     |     | 1000-persons<br>Residential |      |     | 4500-persons Office |      |     |
|------------------------|------------------------------|-----|-----|-----------------------------|------|-----|---------------------|------|-----|
|                        | 5%                           | 50% | 95% | 5%                          | 50%  | 95% | 5%                  | 50%  | 95% |
| <i>Campylobacter</i>   | 2.4                          | 3.7 | 5.1 | -Inf                        | -Inf | 4.2 | -Inf                | 2.3  | 5.2 |
| <i>Cryptosporidium</i> | 1.4                          | 3.0 | 4.2 | -Inf                        | -Inf | 3.4 | -Inf                | -Inf | 4.4 |
| <i>Norovirus</i>       | 7.1                          | 7.5 | 8.1 | 3.5                         | 6.5  | 8.2 | 6.5                 | 7.5  | 8.6 |
| <i>Rotavirus</i>       | 5.1                          | 6.2 | 7.4 | -Inf                        | -Inf | 6.8 | -Inf                | 5.0  | 7.6 |

a. -Inf indicates a concentration of 0 #/L.

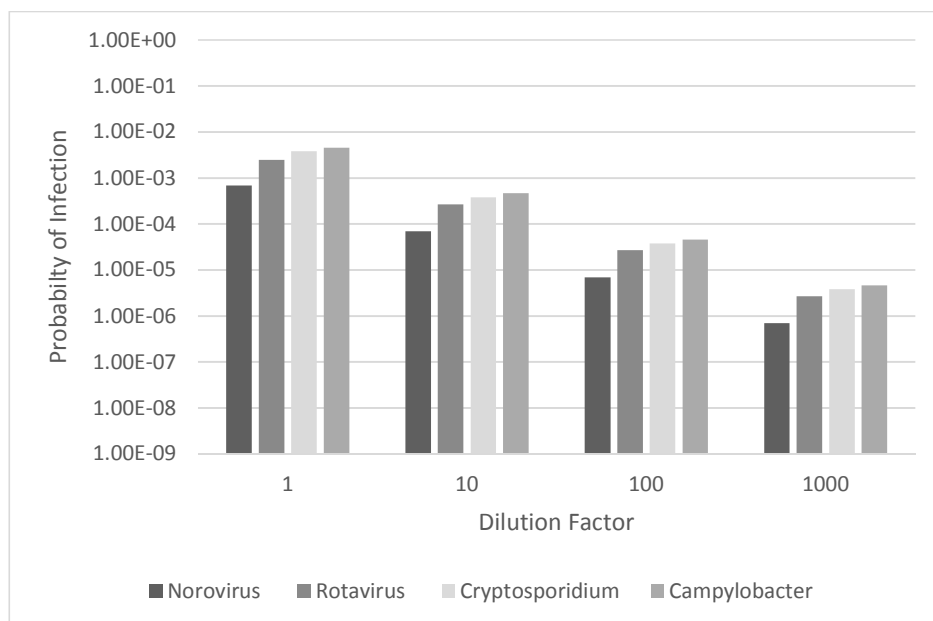

**Figure S1.** 95<sup>th</sup> percentile event probability of infection for ingestion of potable water contaminated by domestic, non-potable reclaimed wastewater from residential collection of 40,000 people.<sup>1</sup> .

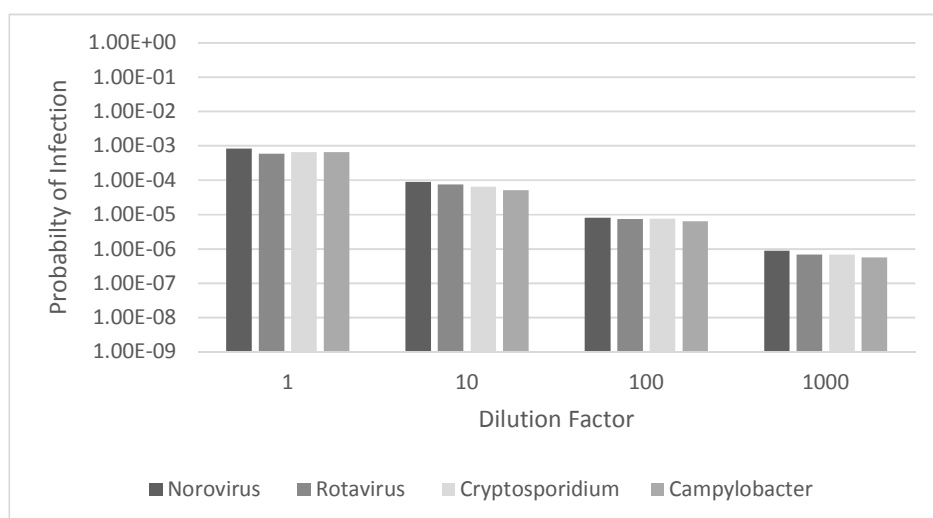

**Figure S2.** 95<sup>th</sup> percentile event probability of infection for ingestion of potable water contaminated by domestic, non-potable reclaimed wastewater from residential collection of 1,000 people.<sup>1</sup> .

<sup>1</sup> The dilution factor is expressed as 1 part intrusion water: X parts total water. *Norovirus* lower-bound dose-response results and *Cryptosporidium* upper-bound dose-response results presented.

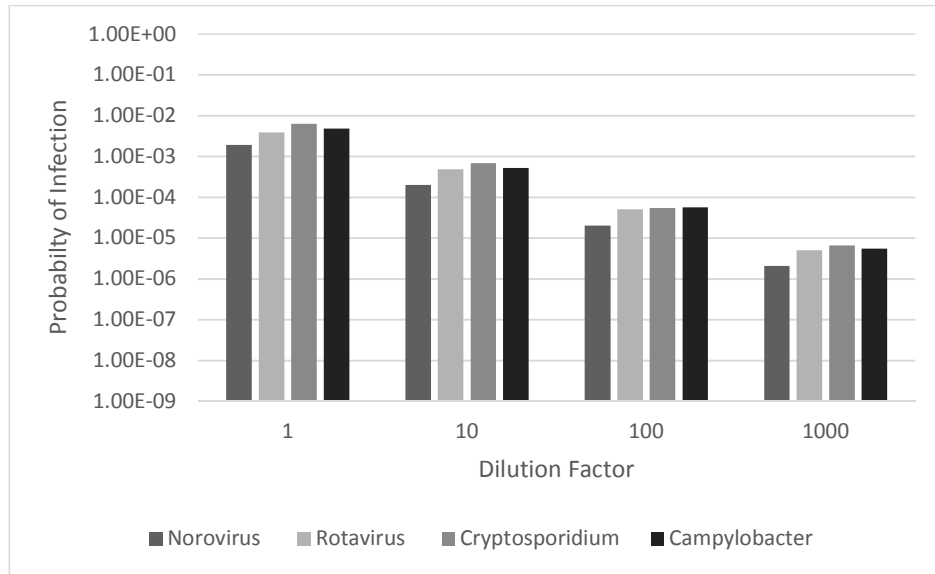

**Figure S3.** 95<sup>th</sup> percentile event probability of infection for ingestion of potable water contaminated by domestic, non-potable reclaimed wastewater from office collection of 4,500 people.<sup>1</sup> .

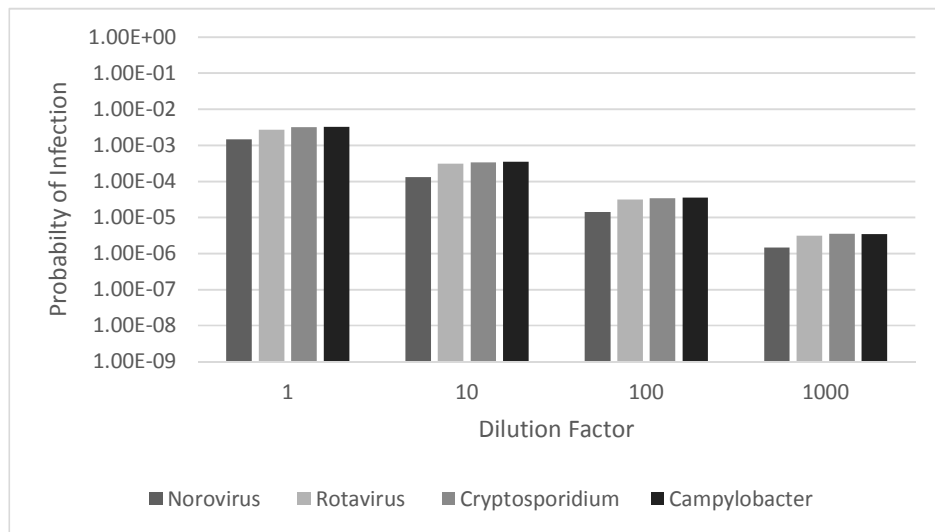

**Figure S4.** 95<sup>th</sup> percentile event probability of infection for ingestion of potable water contaminated by domestic, non-potable reclaimed greywater from residential collection of 40,000 people. <sup>1</sup> .

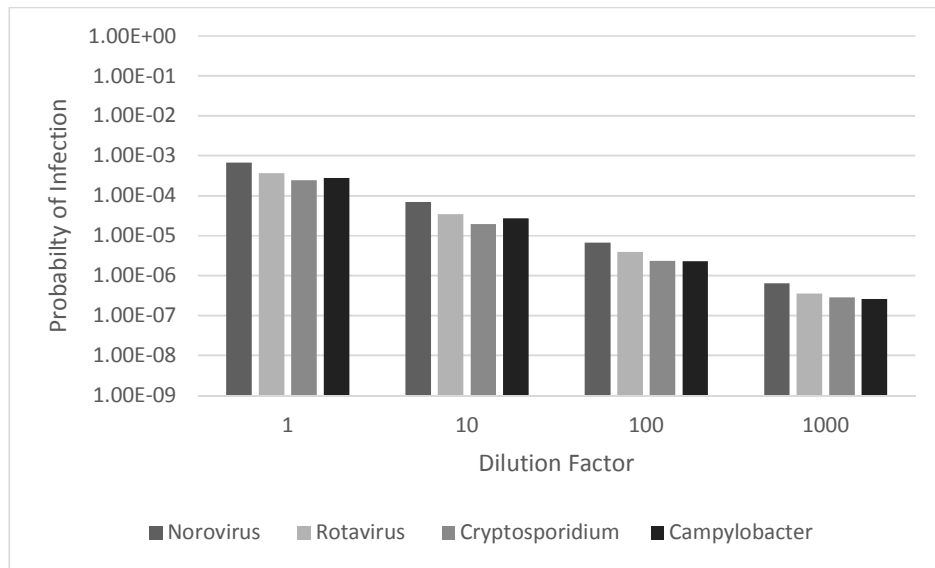

**Figure S5.** 95<sup>th</sup> percentile event probability of infection for ingestion of potable water contaminated by domestic, non-potable reclaimed greywater from residential collection of 1,000 people.<sup>1</sup>

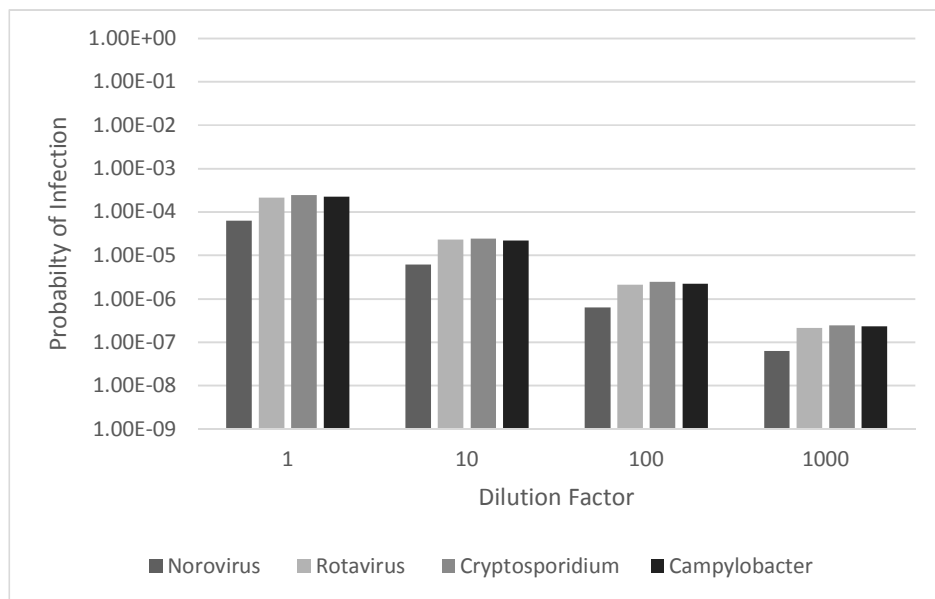

**Figure S6.** 95<sup>th</sup> percentile event probability of infection for ingestion of potable water contaminated by domestic, non-potable reclaimed greywater from office collection of 4,500 people.<sup>1</sup>

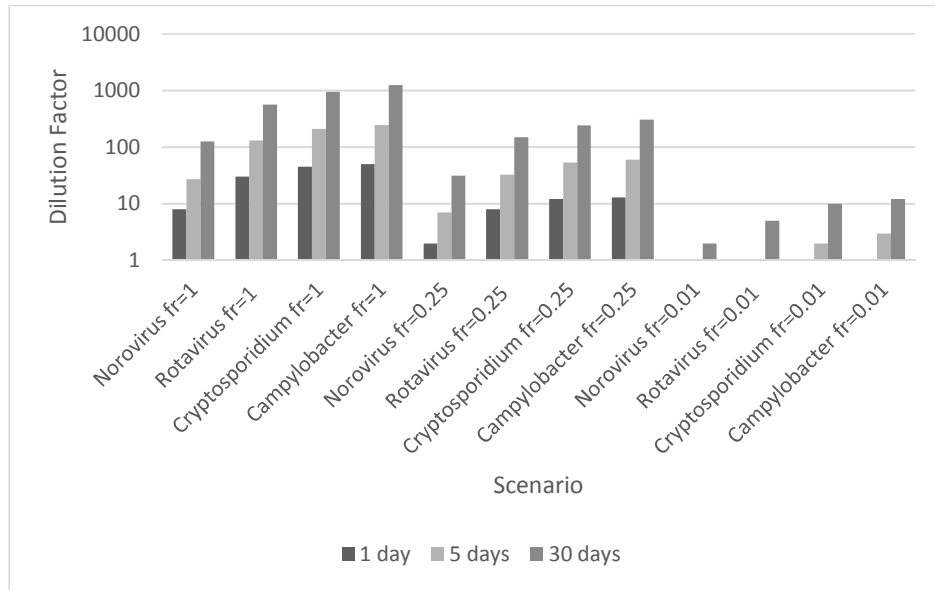

**Figure S7.** Safe dilution factor of intrusion of non-potable reclaimed wastewater (generated by 40,000-person residential collection and treated for indoor reuse) to potable water supply that results in a 95<sup>th</sup> percentile annual risk of infection from non-potable indoor reuse equivalent to  $10^{-4}$  ppy.<sup>2</sup>

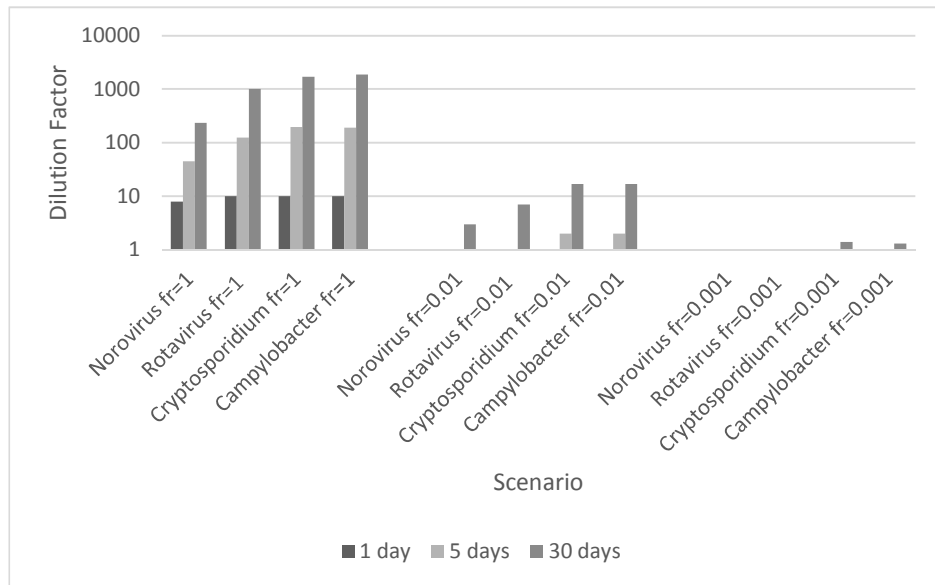

**Figure S8.** Safe dilution factor of intrusion of non-potable reclaimed wastewater (generated by 1,000-person residential collection and treated for indoor reuse) to potable water supply that results in a 95<sup>th</sup> percentile annual risk of infection from non-potable indoor reuse equivalent to  $10^{-4}$  ppy.<sup>2</sup>

<sup>2</sup> The intrusion event duration was either 1, 5 or 30 days for various fractions of the population exposed to the intrusion event (fr). *Norovirus* lower-bound dose-response results and *Cryptosporidium* upper-bound dose-resposne results presented.



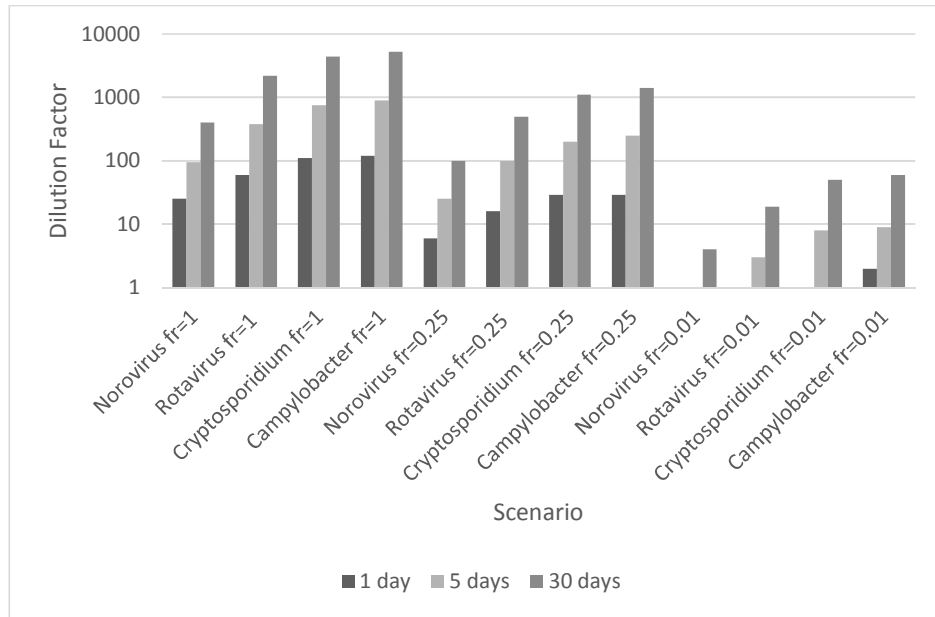

**Figure S9.** Safe dilution factor of intrusion of non-potable reclaimed wastewater (generated by 4,500-person office collection and treated for indoor reuse) to potable water supply that results in a 95<sup>th</sup> percentile annual risk of infection from non-potable indoor reuse equivalent to  $10^{-4}$  ppy.<sup>2</sup>

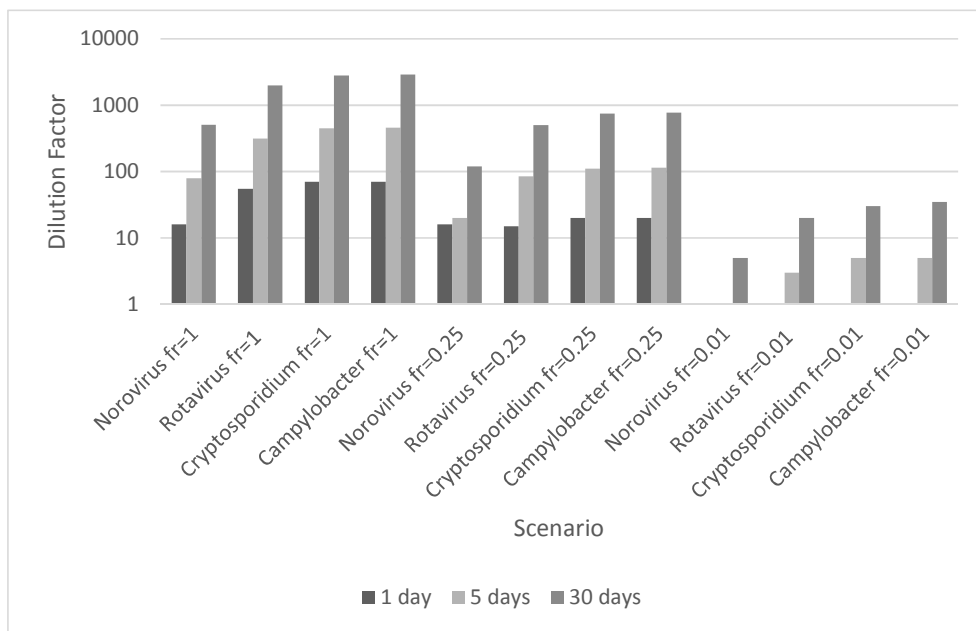

**Figure S10.** Safe dilution factor of intrusion of non-potable reclaimed greywater (generated by 40,000-person residential collection and treated for indoor reuse) to potable water supply that results in a 95<sup>th</sup> percentile annual risk of infection from non-potable indoor reuse equivalent to  $10^{-4}$  ppy.<sup>2</sup>

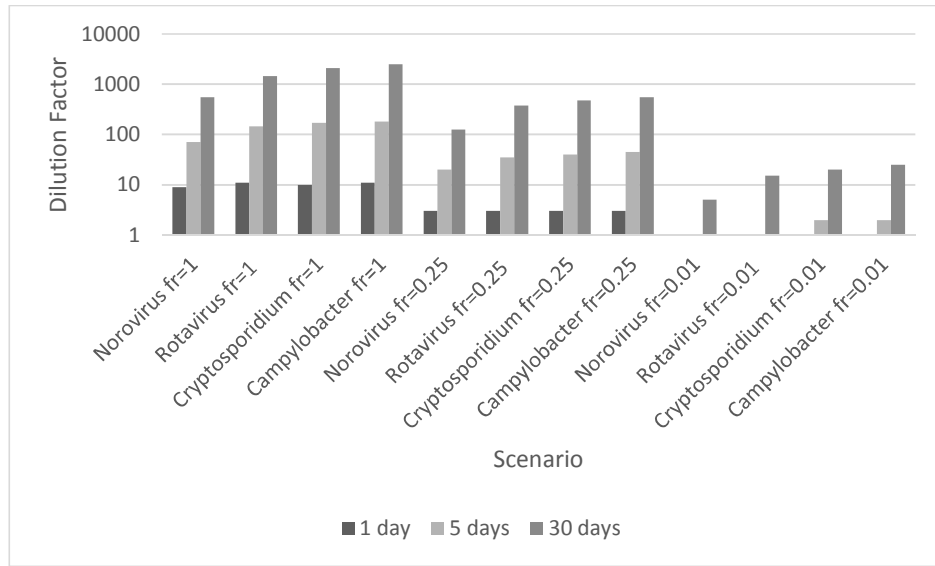

**Figure S11.** Safe dilution factor of intrusion of non-potable reclaimed greywater (generated by 1,000-person residential collection and treated for indoor reuse) to potable water supply that results in a 95<sup>th</sup> percentile annual risk of infection from non-potable indoor reuse equivalent to  $10^{-4}$  ppy. <sup>2</sup>

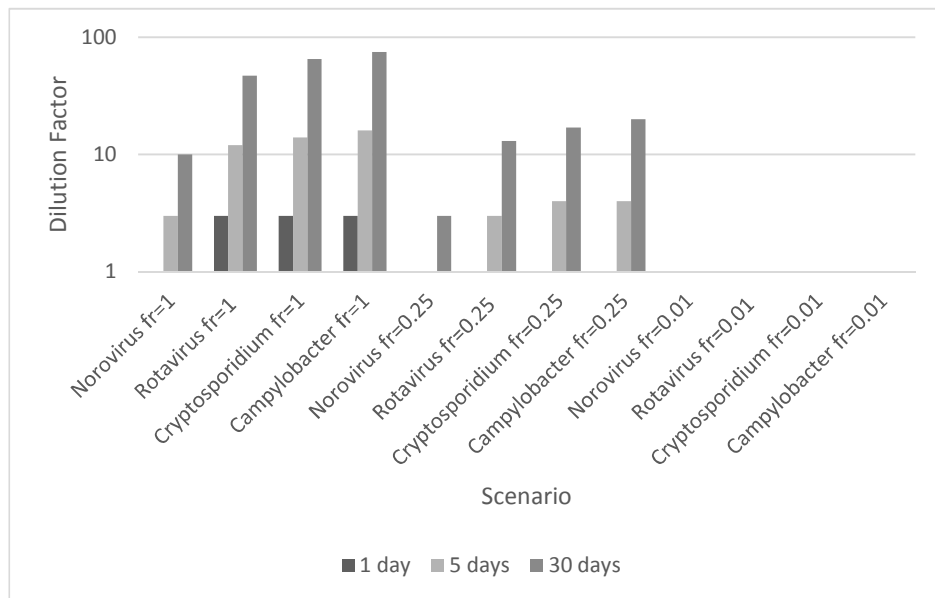

**Figure S12.** Safe dilution factor of intrusion of non-potable reclaimed greywater (generated by 4,500-person office collection and treated for indoor reuse) to potable water supply that results in a 95<sup>th</sup> percentile annual risk of infection from non-potable indoor reuse equivalent to  $10^{-4}$  ppy. <sup>2</sup>

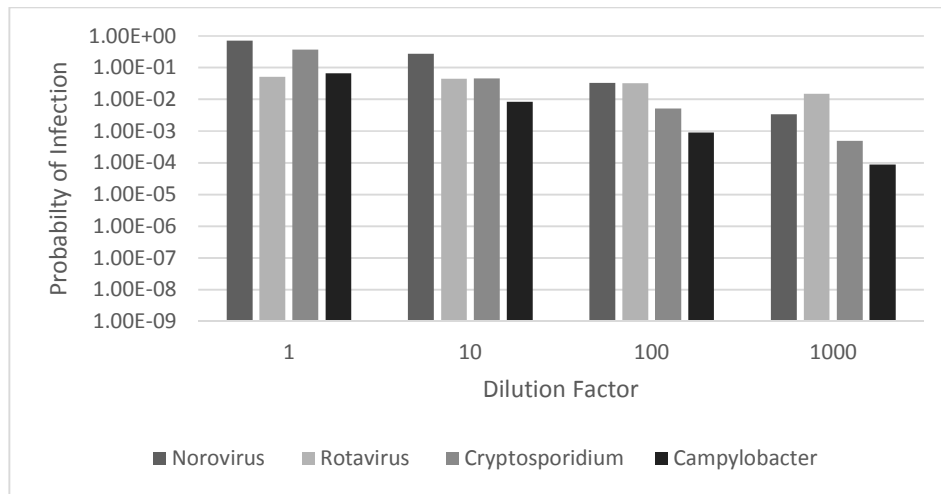

**Figure S13.** 95<sup>th</sup> percentile event probability of infection for ingestion of domestic, non-potable reclaimed wastewater contaminated by domestic wastewater generated by a 40,000-person residential collection system.<sup>1</sup> .

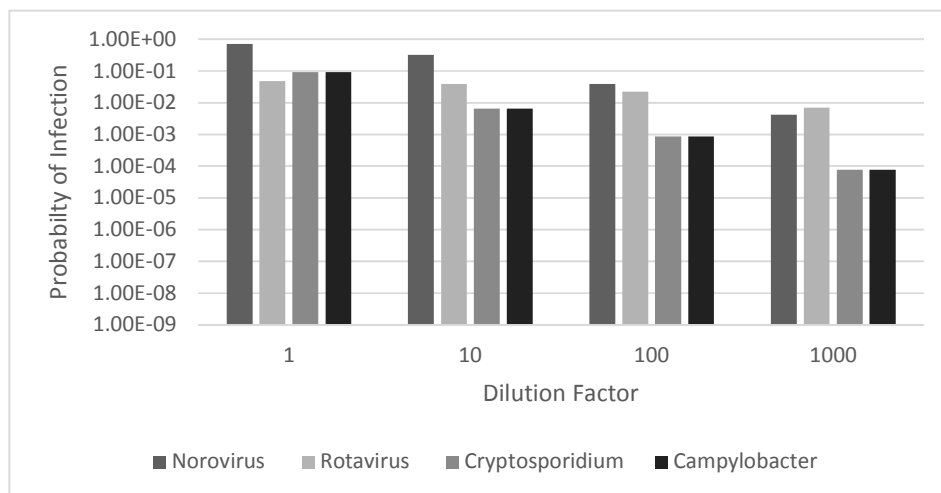

**Figure S14.** 95<sup>th</sup> percentile event probability of infection for ingestion of domestic, non-potable reclaimed wastewater contaminated by domestic wastewater generated by a 1,000-person residential collection system.<sup>1</sup> .

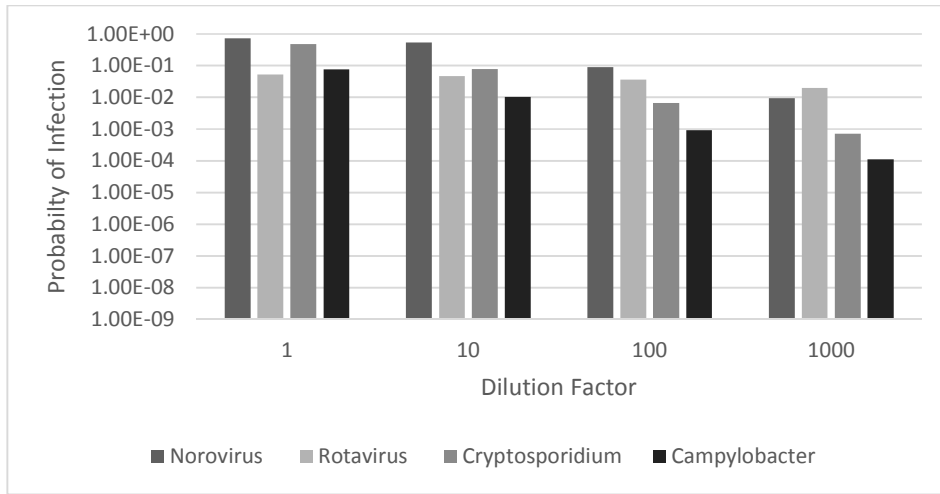

**Figure S15.** 95<sup>th</sup> percentile event probability of infection for ingestion of domestic, non-potable reclaimed wastewater contaminated by domestic wastewater generated by a 4,500-person office collection system.<sup>1</sup> .

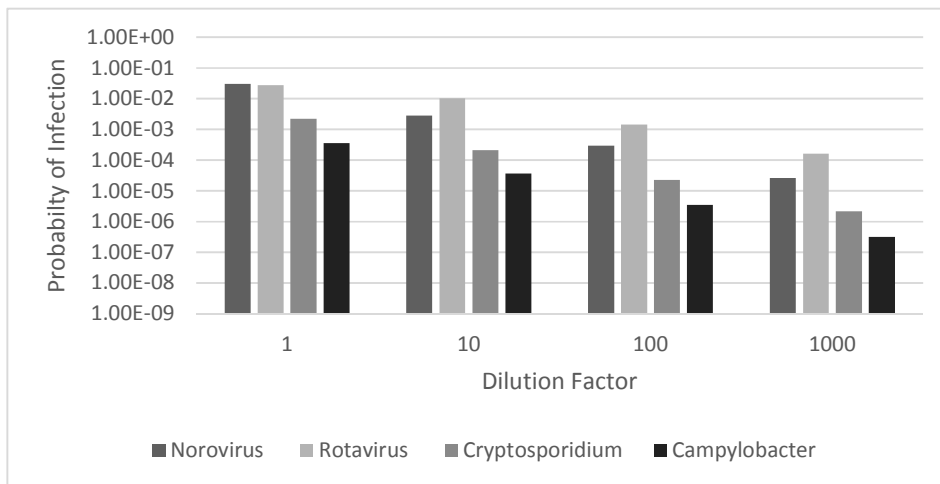

**Figure S16.** 95<sup>th</sup> percentile event probability of infection for ingestion of domestic, non-potable reclaimed greywater contaminated by domestic greywater generated by a 40,000-person residential collection system.<sup>1</sup> .

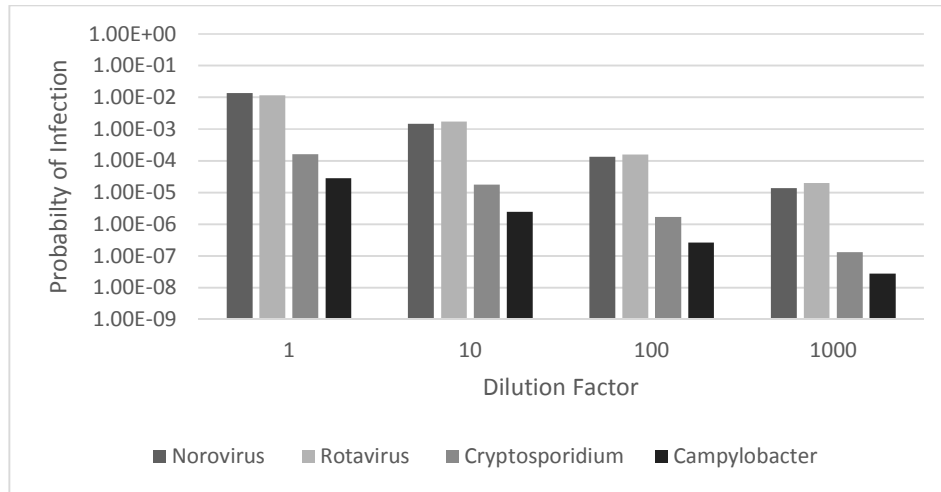

**Figure S17.** 95<sup>th</sup> percentile event probability of infection for ingestion of domestic, non-potable reclaimed greywater contaminated by domestic greywater generated by a 1,000-person residential collection system.<sup>1</sup>

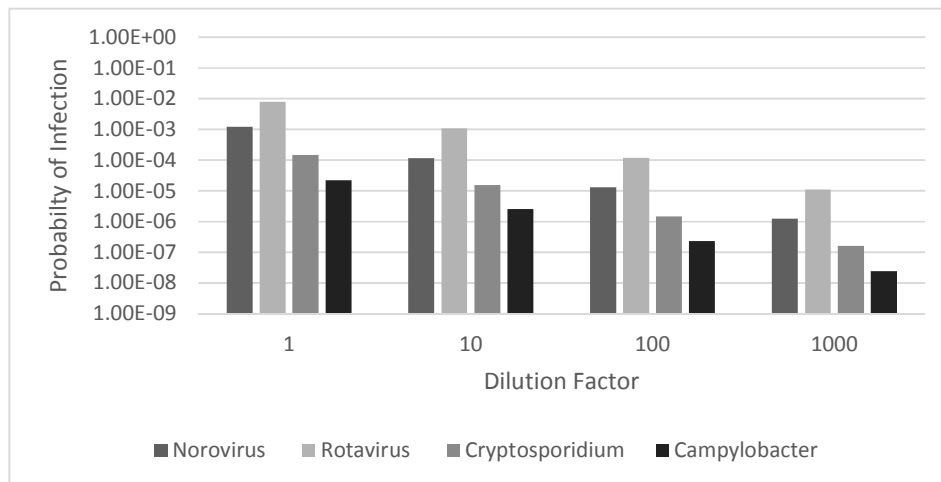

**Figure S18.** 95<sup>th</sup> percentile event probability of infection for ingestion of domestic, non-potable reclaimed greywater contaminated by domestic greywater generated by a 4,500-person office collection system.<sup>1</sup>

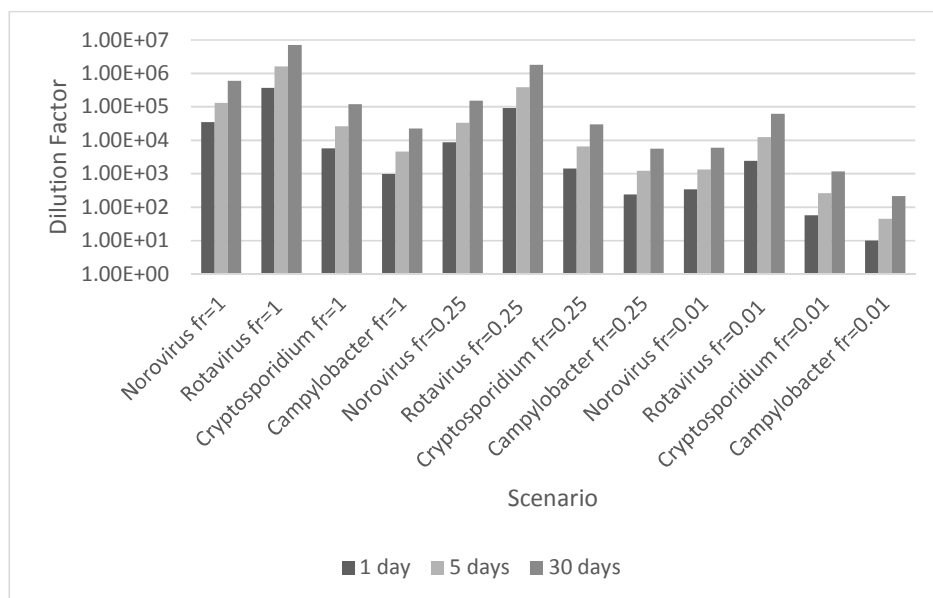

**Figure S19.** Safe dilution factor of intrusion of residential wastewater (generated by 40,000-person collection) to non-potable reclaimed water supply that results in a 95<sup>th</sup> percentile annual risk of infection from non-potable domestic, indoor reuse equivalent to the benchmark ( $10^{-4}$  ppy).<sup>2</sup>

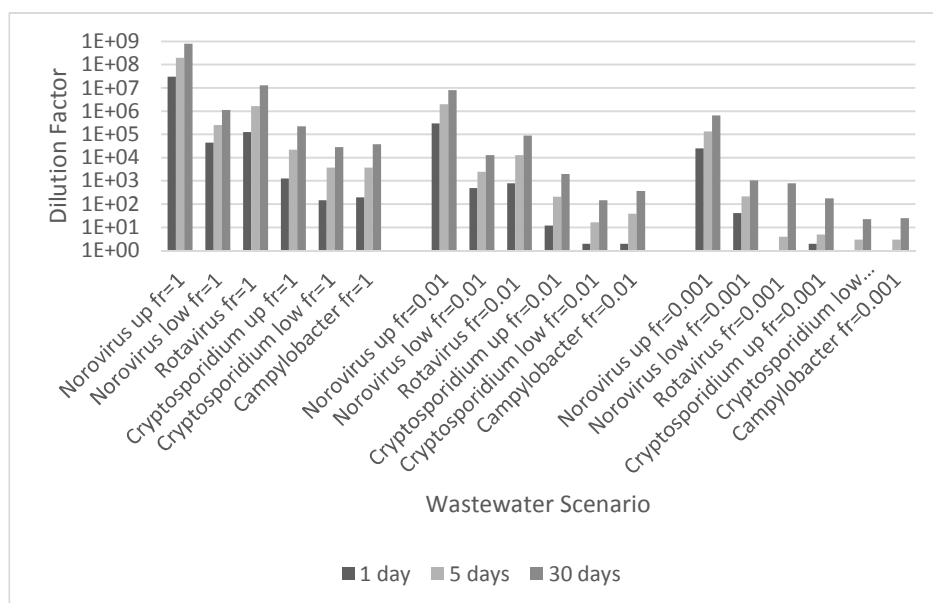

**Figure S20.** Safe dilution factor of intrusion of residential wastewater (generated by 1,000-person collection) to non-potable reclaimed water supply that results in a 95<sup>th</sup> percentile annual risk of infection from non-potable domestic, indoor reuse equivalent to the benchmark ( $10^{-4}$  ppy).<sup>2</sup>

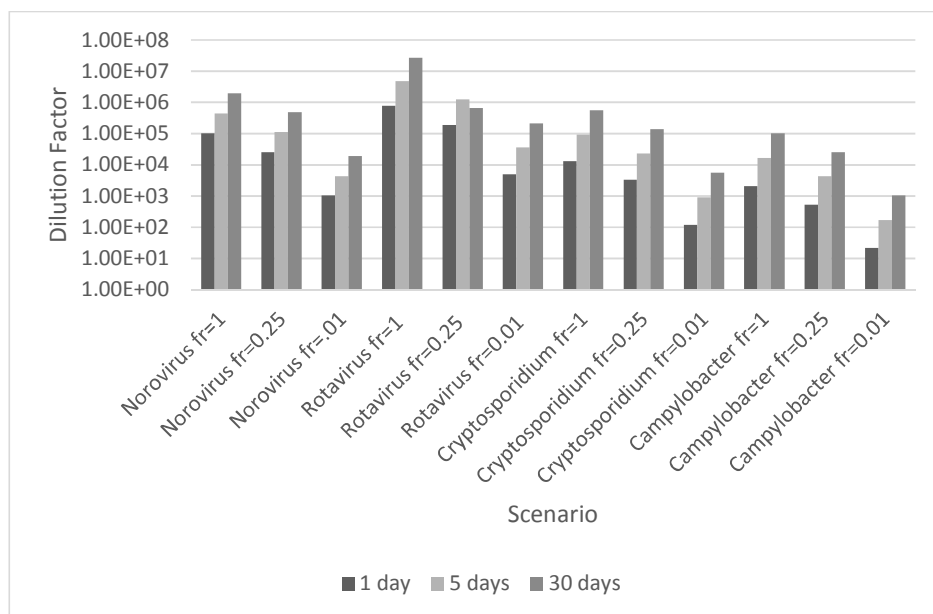

**Figure S21.** Safe dilution factor of intrusion of office wastewater (generated by 4,500-person collection) to non-potable reclaimed water supply that results in a 95<sup>th</sup> percentile annual risk of infection from non-potable domestic, indoor reuse equivalent to the benchmark ( $10^{-4}$  ppy). <sup>2</sup>.

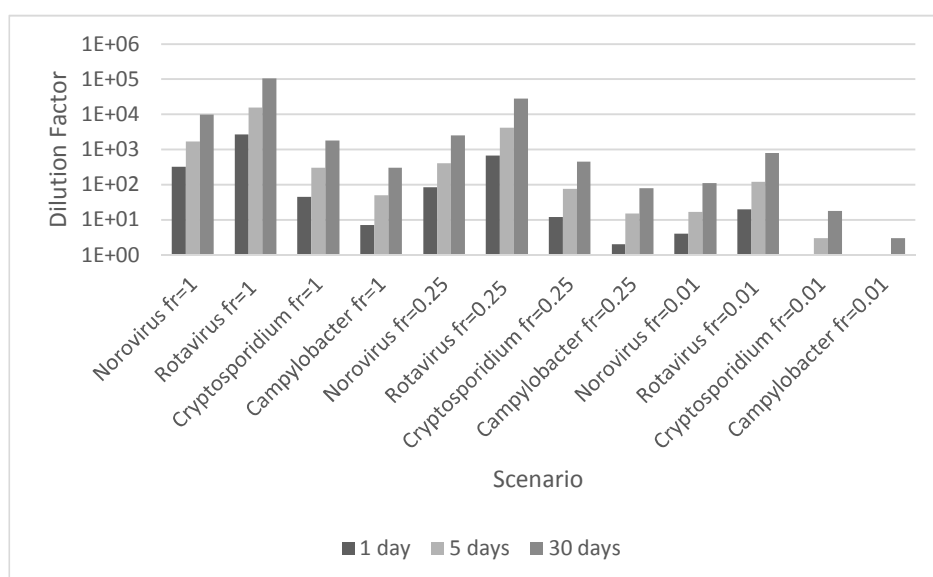

**Figure S22.** Safe dilution factor of intrusion of residential greywater (generated by 40,000-person collection) to non-potable water supply that results in a 95<sup>th</sup> percentile annual risk of infection from non-potable domestic, indoor reuse equivalent to the benchmark ( $10^{-4}$  ppy). <sup>2</sup>.

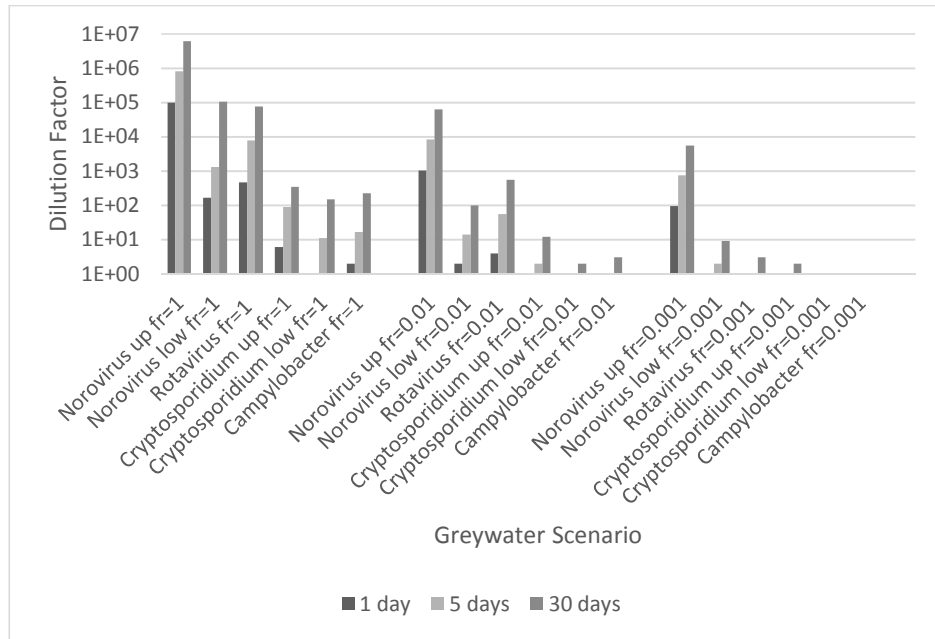

**Figure S23.** Safe dilution factor of intrusion of residential greywater (generated by 1,000-person collection) to non-potable water supply that results in a 95<sup>th</sup> percentile annual risk of infection from non-potable domestic, indoor reuse equivalent to the benchmark ( $10^{-4}$  ppy).<sup>2</sup>

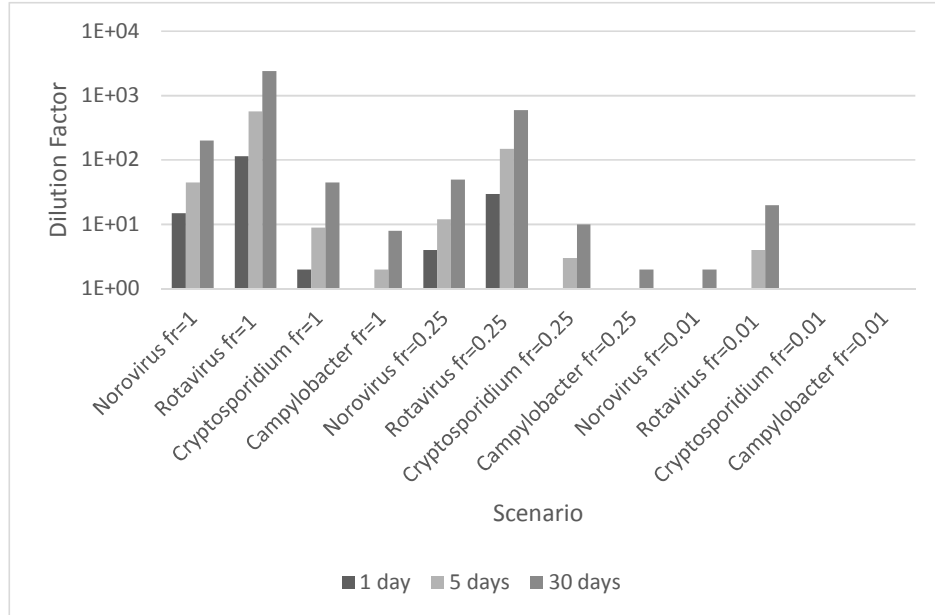

**Figure S24.** Safe dilution factor of intrusion of residential greywater (generated by 4,500-person collection) to non-potable water supply that results in a 95<sup>th</sup> percentile annual risk of infection from non-potable domestic, indoor reuse equivalent to the benchmark ( $10^{-4}$  ppy).<sup>2</sup>
